# Supplementary material for: Maternal and infant outcomes of Syrian and Palestinian refugees, Lebanese and migrant women giving birth in a tertiary public hospital in Lebanon: a secondary analysis of an obstetric database
Source: HighWire-hosted journal article supplement (doi:10.1136/bmjopen-2022-064859), 2023-02-01
Supplement: bmjopen-2022-064859supp001_data_supplement.pdf [file bmjopen-2022-064859supp001_data_supplement.pdf]

Supplementary figure1. Flow diagram of RHUH IT outputs into dataset for analysis.

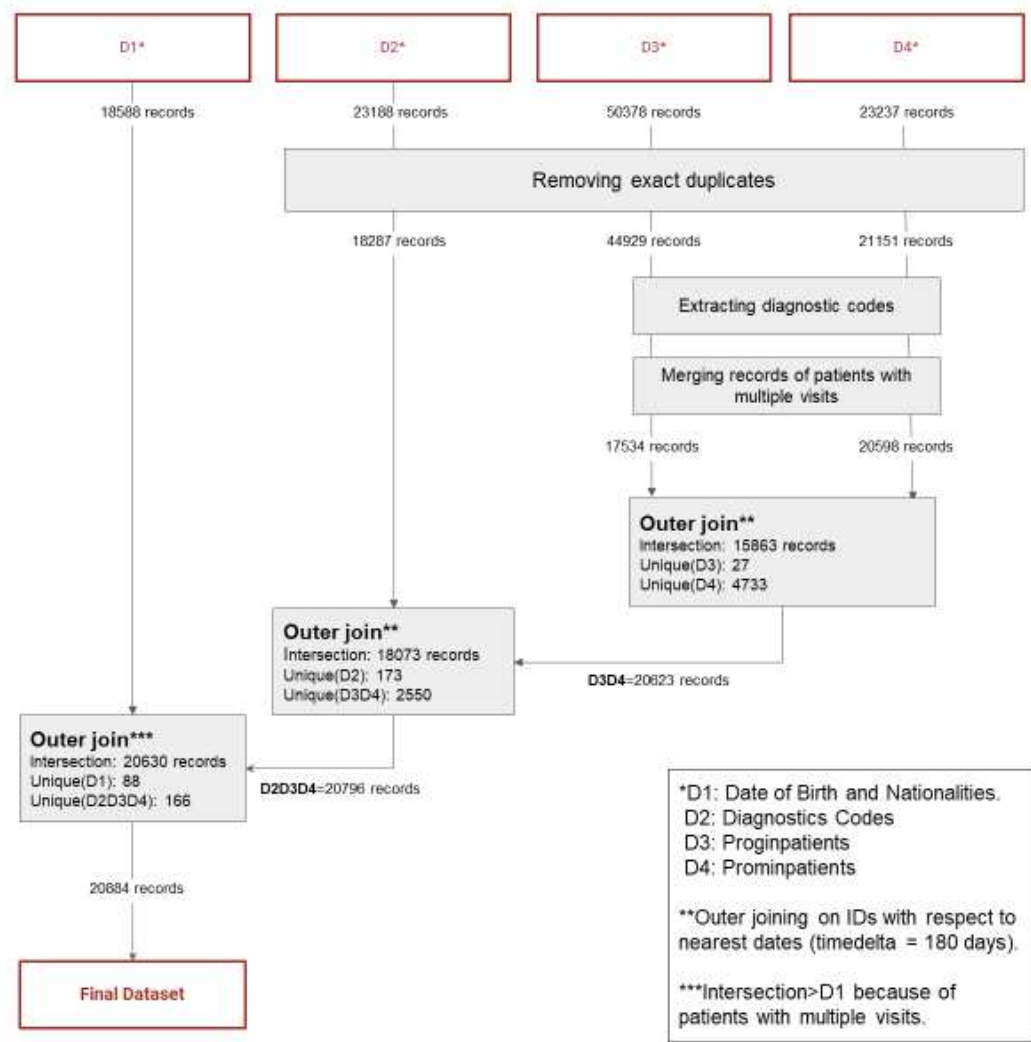

Supplementary figure 2. Flow diagram of study population

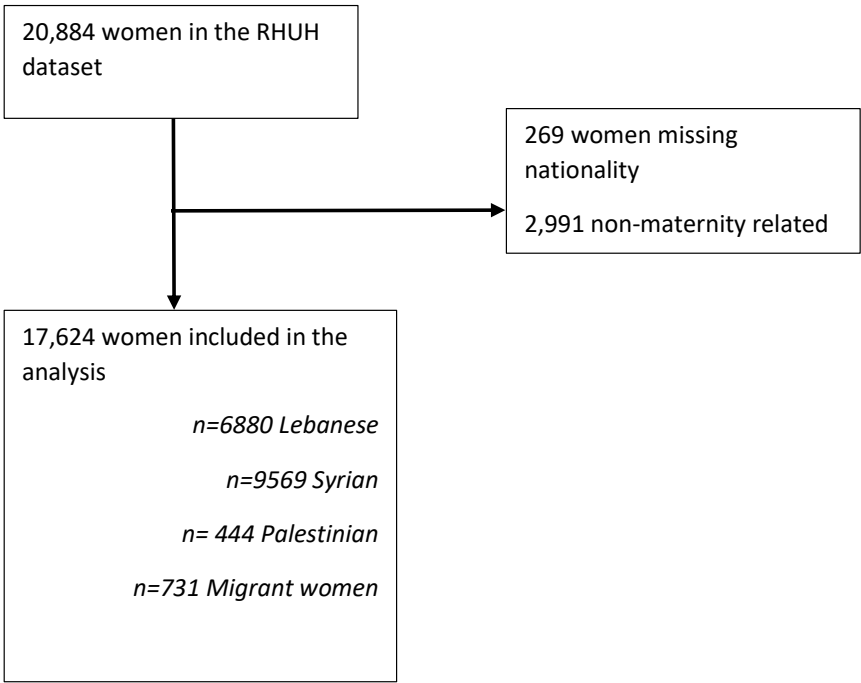

Supplementary figure 3. Caesarean section rate at RHUH by nationality of women

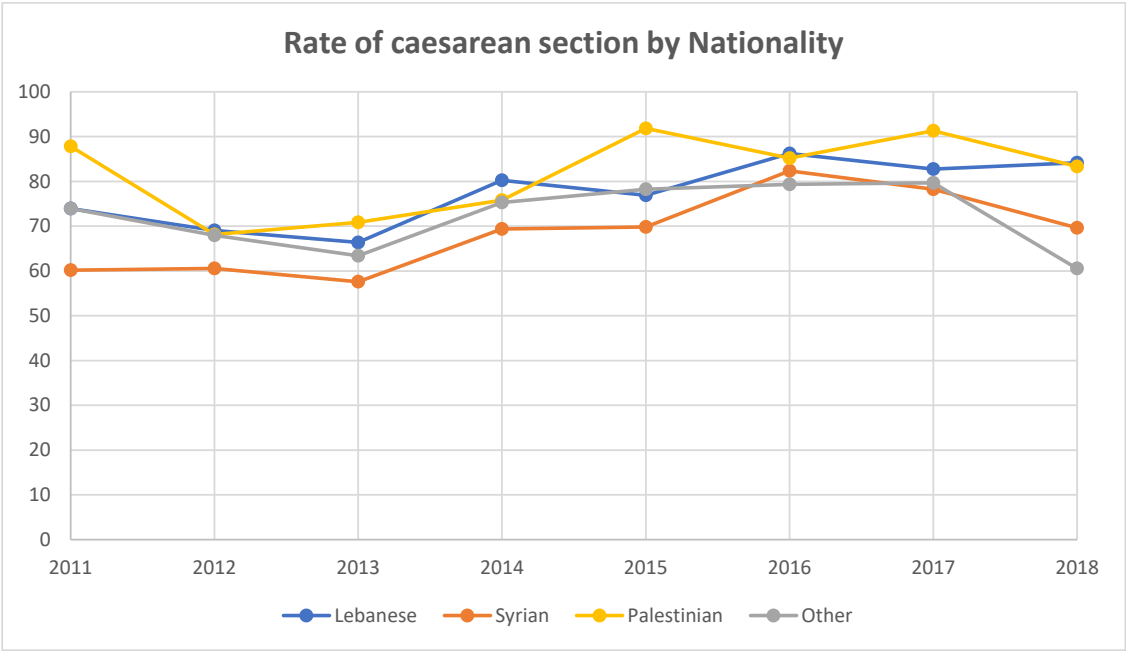

Supplementary Table 1. Machine learning model attributes for each variable

| Column                                     | Model               | Vectorizer    | Max features | Document Frequency Range | Weights     | Accuracy | Precision | Recall | F1   |
|--------------------------------------------|---------------------|---------------|--------------|--------------------------|-------------|----------|-----------|--------|------|
| Csection Number                            | Logistic Regression | Count         | 1000         | 1~99%                    | Balanced    | 0.99     | 0.99      | 0.99   | 0.99 |
| Diabetes                                   | Random Forest       | Tfidf         | 800          | 1~90%                    | N/A         | 0.96     | 0.96      | 0.96   | 0.96 |
| Episiotomy                                 | Logistic Regression | Tfidf         | 2000         | 1~99%                    | Balanced    | 0.97     | 0.97      | 0.97   | 0.97 |
| Gestational diabetes                       | Random Forest       | Count         | 500          | 2~50%                    | N/A         | 0.9      | 0.9       | 0.9    | 0.89 |
| Gestational age                            | Regex               | N/A           | N/A          | N/A                      | N/A         | 0.84     | 0.91      | 0.84   | 0.86 |
| Hypertension complication of pregnancy (2) | Logistic Regression | Tfidf         | 1000         | 10~90%                   | Balanced    | 0.97     | 0.97      | 0.97   | 0.96 |
| Hypertension                               | Logistic Regression | Tfidf         | 500          | 5~70%                    | Balanced    | 0.96     | 0.96      | 0.96   | 0.96 |
| Hysterectomy                               | Logistic Regression | Tfidf         | 800          | 1~99%                    | Balanced    | 0.97     | 0.97      | 0.97   | 0.97 |
| Intrauterine fetal death                   | Logistic Regression | Tfidf         | 1000         | 5~70%                    | 0:0.2,1:0.8 | 0.99     | 0.99      | 0.99   | 0.99 |
| IUFD still birth                           | Logistic Regression | Tfidf         | 800          | 1~90%                    | N/A         | 0.99     | 0.99      | 0.99   | 0.99 |
| Major complication of pregnancy (1)        | Logistic Regression | Tfidf         | 1000         | 12~70%                   | Balanced    | 0.99     | 0.99      | 0.99   | 0.99 |
| Parity                                     | Regex               | N/A           | N/A          | N/A                      | N/A         | 0.98     | 0.99      | 0.98   | 0.98 |
| Previous number csection                   | Logistic Regression | Count         | 2000         | 1~99%                    | 0:0.2       | 0.78     | 0.75      | 0.78   | 0.76 |
| Smoking                                    | LSTM                | preprocessing | 50           | N/A                      | N/A         | 0.93     | 0.94      | 0.93   | 0.93 |
| Transfused blood                           | Logistic Regression | Tfidf         | 1000         | 10~99%                   | Balanced    | 0.96     | 0.96      | 0.96   | 0.96 |

Supplementary Table 2. ICD-10 codes

| ICD10 code   | Disease                                                                  | ICD10 code   | Disease                                                |
|--------------|--------------------------------------------------------------------------|--------------|--------------------------------------------------------|
| <b>O60</b>   | Preterm labor                                                            | <b>O80.8</b> | Other single spontaneous delivery                      |
| <b>O60.0</b> | Preterm labor without delivery                                           | <b>O80.9</b> | Single spontaneous delivery, unspecified               |
| <b>O60.1</b> | Preterm labor with preterm delivery                                      | <b>O81</b>   | Single delivery by forceps and vacuum extractor        |
| <b>O61</b>   | Failed induction of labor                                                | <b>O81.0</b> | Low forceps delivery                                   |
| <b>O62.0</b> | Primary inadequate contractions                                          | <b>O81.1</b> | Mid-cavity forceps delivery                            |
| <b>O62.2</b> | Other uterine inertia                                                    | <b>O81.3</b> | Other and unspecified forceps delivery                 |
| <b>O64.1</b> | Obstructed labor due to breech presentation                              | <b>O81.4</b> | Vaccum extractor delivery                              |
| <b>O66.1</b> | Obstructed labor due to locked twins                                     | <b>O82</b>   | Single delivery by caesarean section                   |
| <b>O68</b>   | Labor and delivery complicated by abnormality of fetal acid-base balance | <b>O82.0</b> | delivery by elective C-section                         |
| <b>O69.0</b> | Labour and delivery complicated by prolapse of cord                      | <b>O82.1</b> | delivery by emergency c-section                        |
| <b>O71.1</b> | Rupture of uterus during labor                                           | <b>O82.2</b> | delivery by emergency c-section/hysterectomy           |
| <b>O71.3</b> | Obstetric laceration of cervix                                           | <b>O82.8</b> | Other single delivery by caesarean section             |
| <b>O71.4</b> | Obstetric high vaginal laceration alone                                  | <b>O82.9</b> | Delivery by caesarean section, unspecified             |
| <b>O71.9</b> | Obstetric trauma, unspecified                                            | <b>O84</b>   | Multiple delivery                                      |
| <b>O72</b>   | Postpartum hemorrhage                                                    | <b>O84.0</b> | Multiple delivery, all spontaneous                     |
| <b>O72.2</b> | Delayed and secondary postpartum hemorrhage                              | <b>O84.1</b> | Multiple delivery, all by forceps and vacuum extractor |
| <b>O73</b>   | Retained placenta and membranes, without hemorrhage                      | <b>O84.2</b> | Multiple delivery, all by caesarean section            |
| <b>O73.0</b> | Retained placenta without hemorrhage                                     | <b>Z38.3</b> | Twin, born in hospital                                 |

|              |                                                                 |              |                                       |
|--------------|-----------------------------------------------------------------|--------------|---------------------------------------|
| <b>O73.1</b> | Retained portions of placenta and membranes, without hemorrhage | <b>Z37.3</b> | Twins, one liveborn and one stillborn |
| <b>O75.7</b> | Vaginal delivery following previous caesarean section           | <b>Z37.1</b> | Single stillbirth                     |
| <b>O80</b>   | Single spontaneous delivery                                     | <b>Z37.4</b> | Twins, both stillborn                 |
| <b>O80.0</b> | Spontaneous vertex delivery                                     | <b>Z37.2</b> | Twins, both liveborn                  |
| <b>O80.1</b> | Spontaneous breech delivery                                     |              |                                       |

Supplementary Table 3. Specific nationalities of the other nationality group

| Nationality others<br>breakdown | N   | %     |
|---------------------------------|-----|-------|
| <b>Egyptian</b>                 | 48  | 6.57  |
| <b>Ethiopian</b>                | 200 | 27.36 |
| <b>Iraqi</b>                    | 50  | 6.84  |
| <b>Jordanian</b>                | 25  | 3.42  |
| <b>Moroccan</b>                 | 13  | 1.78  |
| <b>Philippine</b>               | 77  | 10.53 |
| <b>Sri Lankan</b>               | 16  | 2.19  |
| <b>Sudanese</b>                 | 39  | 5.34  |
| <b>Turkish</b>                  | 22  | 3.01  |
| <b>Others</b>                   | 241 | 32.97 |
| Total                           | 731 | 100   |
